# Supplementary material
Source: ML conference proceedings conference paper supplement (https://proceedings.mlr.press/v80/lin18b.html)
Supplement: Supplementary file 1 [file lin18b-supp.pdf]

## Supplementary: Optimal Rates of Sketched-regularized Algorithms for Least-squares Regression over Hilbert Spaces

In this appendix, we first prove the lemmas stated in Section 4 and Corollary 5. We then review how the regression setting considered in this paper covers non-parametric regression with kernel methods.

### A. Proofs for Lemmas in Section 4 and Corollary 5

For notational simplicity, we denote

$$\mathcal{R}_\lambda(u) = 1 - \mathcal{G}_\lambda(u)u, \quad (43)$$

and

$$\mathcal{N}(\lambda) = \text{tr}(\mathcal{T}(\mathcal{T} + \lambda)^{-1}).$$

To proceed the proof, we need some basic operator inequalities.

**Lemma 16.** (Fujii et al., 1993) *Let  $A$  and  $B$  be two positive bounded linear operators on a separable Hilbert space. Then*

$$\|A^s B^s\| \leq \|AB\|^s, \quad \text{when } 0 \leq s \leq 1.$$

**Lemma 17.** *Let  $H_1, H_2$  be two separable Hilbert spaces and  $\mathcal{S} : H_1 \rightarrow H_2$  a compact operator. Then for any function  $f : [0, \|\mathcal{S}\|] \rightarrow [0, \infty]$ ,*

$$f(\mathcal{S}\mathcal{S}^*)\mathcal{S} = \mathcal{S}f(\mathcal{S}^*\mathcal{S}).$$

*Proof.* The result can be proved using singular value decomposition of a compact operator.  $\square$

**Lemma 18.** *Let  $A$  and  $B$  be two non-negative bounded linear operators on a separable Hilbert space with  $\max(\|A\|, \|B\|) \leq \kappa^2$  for some non-negative  $\kappa^2$ . Then for any  $\zeta > 0$ ,*

$$\|A^\zeta - B^\zeta\| \leq C_{\zeta, \kappa} \|A - B\|^{\zeta \wedge 1}, \quad (44)$$

where

$$C_{\zeta, \kappa} = \begin{cases} 1 & \text{when } \zeta \leq 1, \\ 2\zeta\kappa^{2\zeta-2} & \text{when } \zeta > 1. \end{cases} \quad (45)$$

*Proof.* The proof is based on the fact that  $u^\zeta$  is operator monotone if  $0 < \zeta \leq 1$ . While for  $\zeta \geq 1$ , the proof can be found in, e.g., (Dicker et al., 2016).  $\square$

**Lemma 19.** *Let  $X$  and  $A$  be bounded linear operators on a separable Hilbert space. Suppose that  $X \succeq 0$  and  $\|A\| \leq 1$ . Then for any  $s \in [0, 1]$ ,*

$$X^* A^s X \leq (X^* A X)^s.$$

*Proof.* Following from (Hansen, 1980) and the fact that the function  $u^s$  with  $s \in [0, 1]$  is operator monotone.  $\square$

#### A.1. Proof of Proposition 7

Adding and subtracting with the same term, and using the triangle inequality, we have

$$\|\mathcal{L}^{-a}(\mathcal{S}_\rho \omega_\lambda^{\mathbf{z}} - f_H)\|_\rho \leq \|\mathcal{L}^{-a} \mathcal{S}_\rho(\omega_\lambda^{\mathbf{z}} - \omega_\lambda)\|_\rho + \|\mathcal{L}^{-a}(\mathcal{S}_\rho \omega_\lambda - f_H)\|_\rho.$$

Applying Part 1) of Lemma 6 to bound the last term, with  $0 \leq a \leq \zeta$ ,

$$\begin{aligned} \|\mathcal{L}^{-a}(\mathcal{S}_\rho \omega_\lambda^{\mathbf{z}} - f_H)\|_\rho &\leq \|\mathcal{L}^{-a} \mathcal{S}_\rho(\omega_\lambda^{\mathbf{z}} - \omega_\lambda)\|_\rho + R\lambda^{\zeta-a} \\ &\leq \|\mathcal{L}^{-a} \mathcal{S}_\rho \mathcal{T}^{a-\frac{1}{2}}\| \|\mathcal{T}^{\frac{1}{2}-a}(\omega_\lambda^{\mathbf{z}} - \omega_\lambda)\|_H + R\lambda^{\zeta-a}. \end{aligned}$$

Using the spectral theorem for compact operators,  $\mathcal{L} = \mathcal{S}_\rho \mathcal{S}_\rho^*$ , and  $\mathcal{T} = \mathcal{S}_\rho^* \mathcal{S}_\rho$ , we have

$$\|\mathcal{L}^{-a} \mathcal{S}_\rho \mathcal{T}^{a-\frac{1}{2}}\| \leq 1,$$

and thus

$$\|\mathcal{L}^{-a}(\mathcal{S}_\rho \omega_\lambda^{\mathbf{z}} - f_H)\|_\rho \leq \|\mathcal{T}^{\frac{1}{2}-a}(\omega_\lambda^{\mathbf{z}} - \omega_\lambda)\|_H + R\lambda^{\zeta-a}.$$

Adding and subtracting with the same term, and using the triangle inequality,

$$\|\mathcal{L}^{-a}(\mathcal{S}_\rho \omega_\lambda^{\mathbf{z}} - f_H)\|_\rho \leq \|\mathcal{T}^{\frac{1}{2}-a}(\omega_\lambda^{\mathbf{z}} - P\omega_\lambda)\|_H + \|\mathcal{T}^{\frac{1}{2}-a}(I - P)\omega_\lambda\|_H + R\lambda^{\zeta-a}.$$

Since  $P$  is an orthogonal projected operator and  $a \in [0, \frac{1}{2}]$ , we have

$$\begin{aligned} & \|\mathcal{T}^{\frac{1}{2}-a}(I - P)\omega_\lambda\|_H \\ &= \|\mathcal{T}^{\frac{1}{2}(1-2a)}(I - P)^{1-2a}(I - P)\omega_\lambda\|_H \\ &\leq \|\mathcal{T}^{\frac{1}{2}(1-2a)}(I - P)^{1-2a}\| \|(I - P)\mathcal{T}^{\frac{1}{2}}\| \|\mathcal{T}^{-\frac{1}{2}}\omega_\lambda\|_H \\ &\leq \|\mathcal{T}^{\frac{1}{2}}(I - P)\|^{1-2a} \|(I - P)\mathcal{T}^{\frac{1}{2}}\| \tau R \kappa^{2(\zeta-1)+\lambda^{(\zeta-1)-}} \\ &= \Delta_5^{1-a} \tau R \kappa^{2(\zeta-1)+\lambda^{(\zeta-1)-}}, \end{aligned}$$

(where for the last second inequality, we used Lemma 16 and Part 2) of Lemma 6), and we subsequently get that

$$\|\mathcal{L}^{-a}(\mathcal{S}_\rho \omega_\lambda^{\mathbf{z}} - f_H)\|_\rho \leq \|\mathcal{T}^{\frac{1}{2}-a}(\omega_\lambda^{\mathbf{z}} - P\omega_\lambda)\|_H + \tau R \kappa^{2(\zeta-1)+\lambda^{(\zeta-1)-}} \Delta_5^{1-a} + R\lambda^{\zeta-a}.$$

Since for all  $\omega \in H$ , and  $a \in [0, \frac{1}{2}]$ ,

$$\begin{aligned} \|\mathcal{T}^{\frac{1}{2}-a}\omega\|_H &\leq \|\mathcal{T}_\lambda^{\frac{1}{2}-a} \mathcal{T}_{\mathbf{x}\lambda}^{-\frac{1}{2}}\| \|\mathcal{T}_{\mathbf{x}\lambda}^{\frac{1}{2}-a}\omega\|_H \\ &\leq \lambda^{-a} \|\mathcal{T}_\lambda^{\frac{1}{2}-a} \mathcal{T}_{\mathbf{x}\lambda}^{-\frac{1}{2}}\| \|\mathcal{T}_{\mathbf{x}\lambda}^{\frac{1}{2}}\omega\|_H \\ &\leq \lambda^{-a} \|\mathcal{T}_\lambda^{\frac{1}{2}} \mathcal{T}_{\mathbf{x}\lambda}^{-\frac{1}{2}}\|^{1-2a} \|\mathcal{T}_{\mathbf{x}\lambda}^{\frac{1}{2}}\omega\|_H \\ &\leq \lambda^{-a} \Delta_1^{\frac{1}{2}-a} \|\mathcal{T}_{\mathbf{x}\lambda}^{\frac{1}{2}}\omega\|_H \end{aligned}$$

(where we used Lemma 16 for the last second inequality), we get

$$\|\mathcal{L}^{-a}(\mathcal{S}_\rho \omega_\lambda^{\mathbf{z}} - f_H)\|_\rho \leq \lambda^{-a} \Delta_1^{\frac{1}{2}-a} \|\mathcal{T}_{\mathbf{x}\lambda}^{\frac{1}{2}}(\omega_\lambda^{\mathbf{z}} - P\omega_\lambda)\|_H + \tau R \kappa^{2(\zeta-1)+\lambda^{(\zeta-1)-}} \Delta_5^{1-a} + R\lambda^{\zeta-a}. \quad (46)$$

In what follows, we estimate  $\|\mathcal{T}_{\mathbf{x}\lambda}^{\frac{1}{2}}(\omega_\lambda^{\mathbf{z}} - P\omega_\lambda)\|_H$ .

Introducing with (11), with  $P^2 = P$ ,

$$\|\mathcal{T}_{\mathbf{x}\lambda}^{\frac{1}{2}}(\omega_\lambda^{\mathbf{z}} - P\omega_\lambda)\|_H = \|\mathcal{T}_{\mathbf{x}\lambda}^{\frac{1}{2}}P(\mathcal{G}_\lambda(P\mathcal{T}_\mathbf{x}P)P\mathcal{S}_{\mathbf{x}}^*\mathbf{y} - P\omega_\lambda)\|_H.$$

Since for any  $\omega \in H$ ,

$$\|\mathcal{T}_{\mathbf{x}\lambda}^{\frac{1}{2}}P\omega\|_H^2 = \langle P\mathcal{T}_{\mathbf{x}\lambda}P\omega, \omega \rangle_H \leq \langle (P\mathcal{T}_\mathbf{x}P + \lambda)\omega, \omega \rangle_H = \|(P\mathcal{T}_\mathbf{x}P + \lambda)^{\frac{1}{2}}\omega\|_H^2,$$

and we thus get

$$\|\mathcal{T}_{\mathbf{x}\lambda}^{\frac{1}{2}}(\omega_\lambda^{\mathbf{z}} - P\omega_\lambda)\|_H \leq \|\mathcal{U}_\lambda^{\frac{1}{2}}(\mathcal{G}_\lambda(\mathcal{U})P\mathcal{S}_{\mathbf{x}}^*\mathbf{y} - P\omega_\lambda)\|_H,$$

where we denote

$$\mathcal{U} = P\mathcal{T}_\mathbf{x}P, \quad \mathcal{U}_\lambda = \mathcal{U} + \lambda. \quad (47)$$

Subtracting and adding with the same term, and applying the triangle inequality, with the notation  $\mathcal{R}_\lambda$  given by (43) and  $P^2 = P$ , we have

$$\|\mathcal{T}_{\mathbf{x}\lambda}^{\frac{1}{2}}(\omega_\lambda^{\mathbf{z}} - P\omega_\lambda)\|_H \leq \underbrace{\|\mathcal{U}_\lambda^{\frac{1}{2}}\mathcal{G}_\lambda(\mathcal{U})P(\mathcal{S}_{\mathbf{x}}^*\mathbf{y} - \mathcal{T}_\mathbf{x}P\omega_\lambda)\|_H}_{\text{Term.A}} + \underbrace{\|\mathcal{U}_\lambda^{\frac{1}{2}}\mathcal{R}_\lambda(\mathcal{U})P\omega_\lambda\|_H}_{\text{Term.B}}. \quad (48)$$

We will estimate the above two terms of the right-hand side.

**Estimating  $\|\mathbf{Term.A}\|_H$ :**

Note that

$$\begin{aligned} & (\mathcal{U}_\lambda^{\frac{1}{2}} \mathcal{G}_\lambda(\mathcal{U}) P \mathcal{T}_{\mathbf{x}\lambda}^{\frac{1}{2}}) (\mathcal{U}_\lambda^{\frac{1}{2}} \mathcal{G}_\lambda(\mathcal{U}) P \mathcal{T}_{\mathbf{x}\lambda}^{\frac{1}{2}})^* \\ &= \mathcal{U}_\lambda^{\frac{1}{2}} \mathcal{G}_\lambda(\mathcal{U}) (\mathcal{U} + \lambda P^2) \mathcal{G}_\lambda(\mathcal{U}) \mathcal{U}_\lambda^{\frac{1}{2}} \\ &\preceq [\mathcal{U}_\lambda \mathcal{G}_\lambda(\mathcal{U})]^2, \end{aligned}$$

where we used  $P^2 = P \preceq I$  for the last inequality. Thus, combining with  $\|A\| = \|A^* A\|^{\frac{1}{2}}$ ,

$$\|\mathcal{U}_\lambda^{\frac{1}{2}} \mathcal{G}_\lambda(\mathcal{U}) P \mathcal{T}_{\mathbf{x}\lambda}^{\frac{1}{2}}\| \leq \|\mathcal{U}_\lambda \mathcal{G}_\lambda(\mathcal{U})\|.$$

Using the spectral theorem, with  $\|\mathcal{U}\| \leq \|\mathcal{T}_{\mathbf{x}}\| \leq \kappa^2$  (implied by (6)), and then applying (12),

$$\|\mathcal{U}_\lambda^{\frac{1}{2}} \mathcal{G}_\lambda(\mathcal{U}) P \mathcal{T}_{\mathbf{x}\lambda}^{\frac{1}{2}}\| \leq \sup_{u \in [0, \kappa^2]} |(u + \lambda) \mathcal{G}_\lambda(u)| \leq \tau.$$

Using the above inequality, and by a simple calculation,

$$\|\mathbf{Term.A}\|_H \leq \|\mathcal{U}_\lambda^{\frac{1}{2}} \mathcal{G}_\lambda(\mathcal{U}) P \mathcal{T}_{\mathbf{x}\lambda}^{\frac{1}{2}}\| \|\mathcal{T}_{\mathbf{x}\lambda}^{-\frac{1}{2}} (\mathcal{S}_{\mathbf{x}}^* \mathbf{y} - \mathcal{T}_{\mathbf{x}} P \omega_\lambda)\| \leq \tau \|\mathcal{T}_{\mathbf{x}\lambda}^{-\frac{1}{2}} (\mathcal{S}_{\mathbf{x}}^* \mathbf{y} - \mathcal{T}_{\mathbf{x}} P \omega_\lambda)\|.$$

Adding and subtracting with the same terms, and using the triangle inequality,

$$\begin{aligned} \|\mathbf{Term.A}\|_H &\leq \tau \|\mathcal{T}_{\mathbf{x}\lambda}^{-\frac{1}{2}} (\mathcal{S}_{\mathbf{x}}^* \mathbf{y} - \mathcal{T}_{\mathbf{x}} \omega_\lambda)\|_H + \tau \|\mathcal{T}_{\mathbf{x}\lambda}^{-\frac{1}{2}} \mathcal{T}_{\mathbf{x}} (I - P) \omega_\lambda\|_H \\ &\leq \tau \|\mathcal{T}_{\mathbf{x}\lambda}^{-\frac{1}{2}} \mathcal{T}_\lambda^{\frac{1}{2}}\| \|\mathcal{T}_\lambda^{-\frac{1}{2}} (\mathcal{S}_{\mathbf{x}}^* \mathbf{y} - \mathcal{T}_{\mathbf{x}} \omega_\lambda)\|_H + \tau \|\mathcal{T}_{\mathbf{x}\lambda}^{-\frac{1}{2}} \mathcal{T}_{\mathbf{x}} (I - P) \omega_\lambda\|_H \\ &\leq \tau \Delta_1^{\frac{1}{2}} \|\mathcal{T}_\lambda^{-\frac{1}{2}} (\mathcal{S}_{\mathbf{x}}^* \mathbf{y} - \mathcal{T}_{\mathbf{x}} \omega_\lambda)\|_H + \tau \|\mathcal{T}_{\mathbf{x}\lambda}^{-\frac{1}{2}} \mathcal{T}_{\mathbf{x}} (I - P) \omega_\lambda\|_H \\ &\leq \tau \Delta_1^{\frac{1}{2}} (\Delta_2 + \|\mathcal{T}_\lambda^{-\frac{1}{2}} (\mathcal{T} \omega_\lambda - \mathcal{S}_\rho^* f_H)\|_H) + \tau \|\mathcal{T}_{\mathbf{x}\lambda}^{-\frac{1}{2}} \mathcal{T}_{\mathbf{x}} (I - P) \omega_\lambda\|_H \\ &\leq \tau \Delta_1^{\frac{1}{2}} (\Delta_2 + \|\mathcal{T}_\lambda^{-\frac{1}{2}} \mathcal{S}_\rho^*\| \|\mathcal{S}_\rho \omega_\lambda - f_H\|_\rho) + \tau \|\mathcal{T}_{\mathbf{x}\lambda}^{-\frac{1}{2}} \mathcal{T}_{\mathbf{x}} (I - P) \omega_\lambda\|_H, \end{aligned}$$

where we used  $\mathcal{T} = \mathcal{S}_\rho^* \mathcal{S}_\rho$  for the last inequality. Applying Part 1) of Lemma 6 and  $\|\mathcal{T}_\lambda^{-\frac{1}{2}} \mathcal{S}_\rho^*\| \leq 1$ ,

$$\|\mathbf{Term.A}\|_H \leq \tau \Delta_1^{\frac{1}{2}} (\Delta_2 + R \lambda^\zeta) + \tau \|\mathcal{T}_{\mathbf{x}\lambda}^{-\frac{1}{2}} \mathcal{T}_{\mathbf{x}} (I - P) \omega_\lambda\|_H. \quad (49)$$

In what follows, we estimate  $\|\mathcal{T}_{\mathbf{x}\lambda}^{-\frac{1}{2}} \mathcal{T}_{\mathbf{x}} (I - P) \omega_\lambda\|_H$ , considering two different cases.

*Case  $\zeta \leq 1$ .*

We have

$$\|\mathcal{T}_{\mathbf{x}\lambda}^{-\frac{1}{2}} \mathcal{T}_{\mathbf{x}} (I - P) \omega_\lambda\|_H \leq \|\mathcal{T}_{\mathbf{x}\lambda}^{-\frac{1}{2}} \mathcal{T}_{\mathbf{x}} \mathcal{T}_{\mathbf{x}\lambda}^{-\frac{1}{2}}\| \|\mathcal{T}_{\mathbf{x}\lambda}^{\frac{1}{2}} \mathcal{T}_\lambda^{-\frac{1}{2}}\| \|\mathcal{T}_\lambda^{\frac{1}{2}} (I - P) \omega_\lambda\|_H \leq \Delta_1^{\frac{1}{2}} \|\mathcal{T}_\lambda^{\frac{1}{2}} (I - P) \omega_\lambda\|_H.$$

Since  $P$  is a projection operator,  $(I - P)^2 = I - P$ , and we thus have

$$\|\mathcal{T}_{\mathbf{x}\lambda}^{-\frac{1}{2}} \mathcal{T}_{\mathbf{x}} (I - P) \omega_\lambda\|_H \leq \Delta_1^{\frac{1}{2}} \|\mathcal{T}_\lambda^{\frac{1}{2}} (I - P)\| \|(I - P) \mathcal{T}^{\frac{1}{2}}\| \|\mathcal{T}^{-\frac{1}{2}} \omega_\lambda\|_H \leq \tau \Delta_1^{\frac{1}{2}} \|\mathcal{T}_\lambda^{\frac{1}{2}} (I - P)\| \Delta_5^{\frac{1}{2}} R \lambda^{\zeta-1},$$

where for the last inequality, we used Part 2) of Lemma 6. Note that for any  $\omega \in H$  with  $\|\omega\|_H = 1$ ,

$$\|\mathcal{T}_\lambda^{\frac{1}{2}} (I - P) \omega\|_H^2 = \langle \mathcal{T}_\lambda (I - P) \omega, (I - P) \omega \rangle_H = \|\mathcal{T}^{\frac{1}{2}} (I - P) \omega\|_H^2 + \lambda \|(I - P) \omega\|_H^2 \leq \|\mathcal{T}^{\frac{1}{2}} (I - P)\|^2 + \lambda \leq \Delta_5 + \lambda.$$

It thus follows that

$$\|\mathcal{T}_\lambda^{\frac{1}{2}} (I - P)\|_H \leq (\Delta_5 + \lambda)^{\frac{1}{2}}, \quad (50)$$

and thus

$$\|\mathcal{T}_{\mathbf{x}\lambda}^{-\frac{1}{2}} \mathcal{T}_{\mathbf{x}} (I - P) \omega_\lambda\|_H \leq \Delta_1^{\frac{1}{2}} (\Delta_5 + \lambda) \tau R \lambda^{\zeta-1}.$$

Introducing the above into (49), we know that **Term.A** can be estimated as ( $\zeta \leq 1$ )

$$\|\mathbf{Term.A}\|_H \leq \tau \Delta_1^{\frac{1}{2}} (\Delta_2 + (\tau + 1)R\lambda^\zeta + \tau R\lambda^{\zeta-1}\Delta_5). \quad (51)$$

Case  $\zeta \geq 1$ .  
We first have

$$\begin{aligned} \|\mathcal{T}_{\mathbf{x}\lambda}^{-\frac{1}{2}} \mathcal{T}_{\mathbf{x}}(I - P)\omega_\lambda\|_H &\leq \Delta_1^{\frac{1}{2}} \|\mathcal{T}_\lambda^{-\frac{1}{2}} \mathcal{T}_{\mathbf{x}}(I - P)\omega_\lambda\|_H \\ &\leq \Delta_1^{\frac{1}{2}} \left( \|\mathcal{T}_\lambda^{-\frac{1}{2}} (\mathcal{T}_{\mathbf{x}} - \mathcal{T})(I - P)\omega_\lambda\|_H + \|\mathcal{T}_\lambda^{-\frac{1}{2}} \mathcal{T}(I - P)\omega_\lambda\|_H \right) \\ &\leq \Delta_1^{\frac{1}{2}} \left( \Delta_4 \|(I - P)\omega_\lambda\|_H + \|\mathcal{T}^{\frac{1}{2}}(I - P)\omega_\lambda\|_H \right). \end{aligned}$$

Since  $P$  is a projection operator,  $(I - P)^2 = I - P$ , we thus have

$$\begin{aligned} \|\mathcal{T}_{\mathbf{x}\lambda}^{-\frac{1}{2}} \mathcal{T}_{\mathbf{x}}(I - P)\omega_\lambda\|_H &\leq \Delta_1^{\frac{1}{2}} \left( \Delta_4 \|I - P\| \|\mathcal{T}^{\frac{1}{2}} \|\mathcal{T}^{-\frac{1}{2}} \omega_\lambda\|_H + \|\mathcal{T}^{\frac{1}{2}}(I - P)\| \|(I - P)\mathcal{T}^{\frac{1}{2}} \|\mathcal{T}^{-\frac{1}{2}} \omega_\lambda\|_H \right) \\ &\leq \Delta_1^{\frac{1}{2}} (\kappa \Delta_4 + \Delta_5) \|\mathcal{T}^{-\frac{1}{2}} \omega_\lambda\|_H, \end{aligned}$$

where we used (3) for the last inequality. Applying Part 2) of Lemma 6, we get

$$\|\mathcal{T}_{\mathbf{x}\lambda}^{-\frac{1}{2}} \mathcal{T}_{\mathbf{x}}(I - P)\omega_\lambda\|_H \leq \Delta_1^{\frac{1}{2}} (\kappa \Delta_4 + \Delta_5) \tau \kappa^{2(\zeta-1)} R.$$

Introducing the above into (49), we get for  $\zeta \geq 1$ ,

$$\|\mathbf{Term.A}\|_H \leq \tau \Delta_1^{\frac{1}{2}} \left( \Delta_2 + R\lambda^\zeta + (\kappa \Delta_4 + \Delta_5) \tau \kappa^{2(\zeta-1)} R \right). \quad (52)$$

**Estimating  $\|\mathbf{Term.B}\|_H$ :**

We estimate  $\|\mathbf{Term.B}\|_H$ , considering two different cases.

Case I:  $\zeta \leq 1$ .

We first have

$$\begin{aligned} \mathcal{U}_\lambda^{\frac{1}{2}} \mathcal{R}_\lambda(\mathcal{U}) P \mathcal{T}_{\mathbf{x}\lambda}^{\frac{1}{2}} (\mathcal{U}_\lambda^{\frac{1}{2}} \mathcal{R}_\lambda(\mathcal{U}) P \mathcal{T}_{\mathbf{x}\lambda}^{\frac{1}{2}})^* &= \mathcal{U}_\lambda^{\frac{1}{2}} \mathcal{R}_\lambda(\mathcal{U}) (\mathcal{U} + \lambda P^2) \mathcal{R}_\lambda(\mathcal{U}) \mathcal{U}_\lambda^{\frac{1}{2}} \\ &\preceq (\mathcal{R}_\lambda(\mathcal{U}) \mathcal{U}_\lambda)^2, \end{aligned}$$

where we used  $P^2 = P \preceq I$  for the last inequality. Thus, according to  $\|A\| = \|AA^*\|^{\frac{1}{2}}$ ,

$$\|\mathcal{U}_\lambda^{\frac{1}{2}} \mathcal{R}_\lambda(\mathcal{U}) P \mathcal{T}_{\mathbf{x}\lambda}^{\frac{1}{2}}\| \leq \|\mathcal{R}_\lambda(\mathcal{U}) \mathcal{U}_\lambda\|.$$

Using the spectral theorem and (13), and noting that  $\|\mathcal{U}\| \leq \|P\|^2 \|\mathcal{T}_{\mathbf{x}}\| \leq \kappa^2$  by (6), we get

$$\|\mathcal{U}_\lambda^{\frac{1}{2}} \mathcal{R}_\lambda(\mathcal{U}) P \mathcal{T}_{\mathbf{x}\lambda}^{\frac{1}{2}}\| \leq \sup_{u \in [0, \kappa^2]} |\mathcal{R}_\lambda(u)(u + \lambda)| \leq \lambda.$$

Using the above inequality and by a direct calculation,

$$\|\mathbf{Term.B}\|_H \leq \|\mathcal{U}_\lambda^{\frac{1}{2}} \mathcal{R}_\lambda(\mathcal{U}) P \mathcal{T}_{\mathbf{x}\lambda}^{\frac{1}{2}}\| \|\mathcal{T}_{\mathbf{x}\lambda}^{-\frac{1}{2}} \mathcal{T}_\lambda^{\frac{1}{2}}\| \|\mathcal{T}^{-\frac{1}{2}} \omega_\lambda\|_H \leq \lambda \Delta_1^{\frac{1}{2}} \|\mathcal{T}^{-\frac{1}{2}} \omega_\lambda\|_H.$$

Applying Part 2) of Lemma 6, we get

$$\|\mathbf{Term.B}\|_H \leq \tau R \lambda^\zeta \Delta_1^{\frac{1}{2}}. \quad (53)$$

Applying the above and (51) into (48), we know that for any  $\zeta \in [0, 1]$ ,

$$\|\mathcal{T}_{\mathbf{x}\lambda}^{\frac{1}{2}} (\omega_\lambda^{\mathbf{z}} - P\omega_\lambda)\|_H \leq \tau \Delta_1^{\frac{1}{2}} (\Delta_2 + (2\tau + 1)R\lambda^\zeta + \tau R \Delta_5 \lambda^{\zeta-1}).$$

Using the above into (46), we can prove the first desired result.

Case II:  $\zeta \geq 1$

We denote

$$\mathcal{V} = \mathcal{T}_{\mathbf{x}}^{\frac{1}{2}} P \mathcal{T}_{\mathbf{x}}^{\frac{1}{2}}, \quad \mathcal{V}_\lambda = \mathcal{V} + \lambda. \quad (54)$$

Noting that  $\mathcal{U} = P\mathcal{T}_x P = P\mathcal{T}_x^{\frac{1}{2}}(P\mathcal{T}_x^{\frac{1}{2}})^*$ , thus following from Lemma 17 (with  $f(u) = (u + \lambda)^{\frac{1}{2}}\mathcal{R}_\lambda(u)$  and  $P^2 = P$ ,

$$\|\mathcal{U}_\lambda^{\frac{1}{2}}\mathcal{R}_\lambda(\mathcal{U})P\mathcal{T}_x^{\zeta-\frac{1}{2}}\| = \|\mathcal{U}_\lambda^{\frac{1}{2}}\mathcal{R}_\lambda(\mathcal{U})(P\mathcal{T}_x^{\frac{1}{2}})\mathcal{T}_x^{\zeta-1}\| = \|(P\mathcal{T}_x^{\frac{1}{2}})\mathcal{V}_\lambda^{\frac{1}{2}}\mathcal{R}_\lambda(\mathcal{V})\mathcal{T}_x^{\zeta-1}\|.$$

Adding and subtracting with the same term, using the triangle inequality,

$$\begin{aligned} \|\mathcal{U}_\lambda^{\frac{1}{2}}\mathcal{R}_\lambda(\mathcal{U})P\mathcal{T}_x^{\zeta-\frac{1}{2}}\| &\leq \|P\mathcal{T}_x^{\frac{1}{2}}\mathcal{V}_\lambda^{\frac{1}{2}}\mathcal{R}_\lambda(\mathcal{V})\mathcal{V}^{\zeta-1}\| + \|P\mathcal{T}_x^{\frac{1}{2}}\mathcal{V}_\lambda^{\frac{1}{2}}\mathcal{R}_\lambda(\mathcal{V})(\mathcal{T}_x^{\zeta-1} - \mathcal{V}^{\zeta-1})\| \\ &\leq \|P\mathcal{T}_x^{\frac{1}{2}}\mathcal{V}_\lambda^{\frac{1}{2}}\mathcal{R}_\lambda(\mathcal{V})\mathcal{V}^{\zeta-1}\| + \|P\mathcal{T}_x^{\frac{1}{2}}\mathcal{V}_\lambda^{\frac{1}{2}}\mathcal{R}_\lambda(\mathcal{V})\|\|\mathcal{T}_x^{\zeta-1} - \mathcal{V}^{\zeta-1}\|. \end{aligned}$$

Using Lemma 18, with (6) and  $\|\mathcal{V}\| \leq \|\mathcal{T}_x\| \leq \kappa^2$ ,

$$\|\mathcal{U}_\lambda^{\frac{1}{2}}\mathcal{R}_\lambda(\mathcal{U})P\mathcal{T}_x^{\zeta-\frac{1}{2}}\| \leq \|P\mathcal{T}_x^{\frac{1}{2}}\mathcal{V}_\lambda^{\frac{1}{2}}\mathcal{R}_\lambda(\mathcal{V})\mathcal{V}^{\zeta-1}\| + \|P\mathcal{T}_x^{\frac{1}{2}}\mathcal{V}_\lambda^{\frac{1}{2}}\mathcal{R}_\lambda(\mathcal{V})\|\kappa^{2(\zeta-2)+}\|\mathcal{T}_x - \mathcal{V}\|^{(\zeta-1)\wedge 1}.$$

Using  $\|A\| = \|A^*A\|^{\frac{1}{2}}$ ,  $P^2 = P$ , the spectral theorem, and (13), for any  $s \in [1, \tau]$ ,

$$\begin{aligned} \|P\mathcal{T}_x^{\frac{1}{2}}\mathcal{V}_\lambda^{\frac{1}{2}}\mathcal{R}_\lambda(\mathcal{V})\mathcal{V}^{s-1}\| &= \|\mathcal{V}^{s-1}\mathcal{R}_\lambda(\mathcal{V})\mathcal{V}_\lambda\mathcal{V}\mathcal{R}_\lambda(\mathcal{V})\mathcal{V}^{s-1}\|^{\frac{1}{2}} \\ &\leq \sup_{u \in [0, \kappa^2]} |\mathcal{R}_\lambda(u)u^{s-\frac{1}{2}}(u + \lambda)^{\frac{1}{2}}| \leq \lambda^s, \end{aligned}$$

and thus we get

$$\|\mathcal{U}_\lambda^{\frac{1}{2}-a}\mathcal{R}_\lambda(\mathcal{U})P\mathcal{T}_x^{\zeta-\frac{1}{2}}\| \leq \lambda^\zeta + \lambda\kappa^{2(\zeta-2)+}\|\mathcal{T}_x - \mathcal{V}\|^{(\zeta-1)\wedge 1}.$$

Using Lemma 14,  $(I - P)^2 = I - P$  and  $\|A^*A\| = \|A\|^2$ , we have

$$\|\mathcal{T}_x - \mathcal{V}\| = \|\mathcal{T}_x^{\frac{1}{2}}(I - P)\mathcal{T}_x^{\frac{1}{2}}\| \leq \|\mathcal{T}_x - \mathcal{T}\| + \|\mathcal{T}^{\frac{1}{2}}(I - P)\mathcal{T}^{\frac{1}{2}}\| \leq \Delta_3 + \Delta_5,$$

and we thus get

$$\|\mathcal{U}_\lambda^{\frac{1}{2}}\mathcal{R}_\lambda(\mathcal{U})P\mathcal{T}_x^{\zeta-\frac{1}{2}}\| \leq \lambda^\zeta + \lambda\kappa^{2(\zeta-2)+}(\Delta_3 + \Delta_5)^{(\zeta-1)\wedge 1}. \quad (55)$$

Now we are ready to estimate  $\|\mathbf{Term.B}\|_H$ . By some direct calculations and Part 2) of Lemma 6,

$$\|\mathbf{Term.B}\|_H \leq \|\mathcal{U}_\lambda^{\frac{1}{2}}\mathcal{R}_\lambda(\mathcal{U})P\mathcal{T}_x^{\zeta-\frac{1}{2}}\| \|\mathcal{T}^{\frac{1}{2}-\zeta}\omega_\lambda\|_H \leq \|\mathcal{U}_\lambda^{\frac{1}{2}}\mathcal{R}_\lambda(\mathcal{U})P\mathcal{T}_x^{\zeta-\frac{1}{2}}\| \tau R.$$

Adding and subtracting with the same term, and using the triangle inequality,

$$\|\mathbf{Term.B}\|_H \leq \tau R \left( \|\mathcal{U}_\lambda^{\frac{1}{2}}\mathcal{R}_\lambda(\mathcal{U})P\mathcal{T}_x^{\zeta-\frac{1}{2}}\| + \|\mathcal{U}_\lambda^{\frac{1}{2}}\mathcal{R}_\lambda(\mathcal{U})\|\|\mathcal{T}^{\zeta-\frac{1}{2}} - \mathcal{T}_x^{\zeta-\frac{1}{2}}\| \right).$$

Using the spectral theorem, with  $\|\mathcal{U}\| \leq \|\mathcal{T}_x\| \leq \kappa^2$  by (6) and (13),

$$\|\mathcal{U}_\lambda^{\frac{1}{2}}\mathcal{R}_\lambda(\mathcal{U})\| = \sup_{u \in ]0, \kappa^2]} |\mathcal{R}_\lambda(u)(u + \lambda)^{\frac{1}{2}}| \leq \lambda^{\frac{1}{2}},$$

and we thus get

$$\|\mathbf{Term.B}\|_H \leq \tau R \left( \|\mathcal{U}_\lambda^{\frac{1}{2}}\mathcal{R}_\lambda(\mathcal{U})P\mathcal{T}_x^{\zeta-\frac{1}{2}}\| + \lambda^{\frac{1}{2}}\|\mathcal{T}^{\zeta-\frac{1}{2}} - \mathcal{T}_x^{\zeta-\frac{1}{2}}\| \right).$$

Applying Lemma 18, with (3) and (6),

$$\|\mathbf{Term.B}\|_H \leq \tau R \left( \|\mathcal{U}_\lambda^{\frac{1}{2}}\mathcal{R}_\lambda(\mathcal{U})P\mathcal{T}_x^{\zeta-\frac{1}{2}}\| + \lambda^{\frac{1}{2}}\kappa^{(2\zeta-3)+}\Delta_3^{(\zeta-\frac{1}{2})\wedge 1} \right).$$

Introducing with (55),

$$\|\mathbf{Term.B}\|_H \leq \tau R \left( \lambda^\zeta + \kappa^{2(\zeta-2)+}\lambda(\Delta_3 + \Delta_5)^{(\zeta-1)\wedge 1} + \kappa^{(2\zeta-3)+}\lambda^{\frac{1}{2}}\Delta_3^{(\zeta-\frac{1}{2})\wedge 1} \right).$$

Introducing the above inequality and (52) into (48), noting that  $\Delta_1 \geq 1$  and  $\kappa^2 \geq 1$ , we know that for any  $\zeta \geq 1$ ,

$$\|\mathcal{T}_{x\lambda}^{\frac{1}{2}}(\omega_\lambda^z - P\omega_\lambda)\|_H \leq \tau\Delta_1^{\frac{1}{2}} \left( \Delta_2 + 2R\lambda^\zeta + \kappa^{2(\zeta-1)}R(\kappa\tau\Delta_4 + \tau\Delta_5 + \lambda(\Delta_3 + \Delta_5)^{(\zeta-1)\wedge 1} + \lambda^{\frac{1}{2}}\Delta_3^{(\zeta-\frac{1}{2})\wedge 1}) \right).$$

Using the above into (46), and by a simple calculation, we can prove the second desired result.

## A.2. Proofs of Lemma 12

We first introduce the following basic probabilistic estimate.

**Lemma 20.** *Let  $\mathcal{X}_1, \dots, \mathcal{X}_m$  be a sequence of independently and identically distributed self-adjoint Hilbert-Schmidt operators on a separable Hilbert space. Assume that  $\mathbb{E}[\mathcal{X}_1] = 0$ , and  $\|\mathcal{X}_1\| \leq B$  almost surely for some  $B > 0$ . Let  $\mathcal{V}$  be a positive trace-class operator such that  $\mathbb{E}[\mathcal{X}_1^2] \preceq \mathcal{V}$ . Then with probability at least  $1 - \delta$ , ( $\delta \in ]0, 1[$ ), there holds*

$$\left\| \frac{1}{m} \sum_{i=1}^m \mathcal{X}_i \right\| \leq \frac{2B\beta}{3m} + \sqrt{\frac{2\|\mathcal{V}\|\beta}{m}}, \quad \beta = \log \frac{4 \operatorname{tr} \mathcal{V}}{\|\mathcal{V}\|\delta}.$$

The above lemma was first proved in (Hsu et al., 2014; Tropp, 2012) for the matrix case, and it was later extended to the general operator case in (Minsker, 2011), see also (Rudi et al., 2015; Bach, 2015; Dicker et al., 2017). We refer to (Rudi et al., 2015; Dicker et al., 2017) for the proof.

Using the above lemma, we can prove Lemma 12.

*Proof of Lemma 12.* We use Lemma 20 to prove the result. Let  $W = m^{-\frac{1}{2}} \mathbf{G} \mathcal{S}_x$ . Denote the  $i$ -th row of  $\mathbf{G}$  by  $\mathbf{a}_i^*$  for all  $i \in [m]$ . Using  $\mathcal{T}_x = \mathcal{S}_x^* \mathcal{S}_x$ , we have

$$\mathcal{T}_{x\lambda}^{-\frac{1}{2}} (\mathcal{T}_x - W^* W) \mathcal{T}_{x\lambda}^{-\frac{1}{2}} = \mathcal{T}_{x\lambda}^{-\frac{1}{2}} \mathcal{S}_x^* (I - m^{-1} \mathbf{G}^* \mathbf{G}) \mathcal{S}_x \mathcal{T}_{x\lambda}^{-\frac{1}{2}} = \frac{1}{m} \sum_{i=1}^m \mathcal{X}_i,$$

where we let

$$\mathcal{X}_i = \mathcal{T}_{x\lambda}^{-\frac{1}{2}} \mathcal{S}_x^* (I - \mathbf{a}_i \mathbf{a}_i^*) \mathcal{S}_x \mathcal{T}_{x\lambda}^{-\frac{1}{2}}.$$

Since  $\mathbf{a}_1 \sim F$ , according to the isotropy property (26) of  $F$ ,

$$\mathbb{E}[\mathcal{X}_1] = \mathcal{T}_{x\lambda}^{-\frac{1}{2}} \mathcal{S}_x^* (I - \mathbb{E}[\mathbf{a}_1 \mathbf{a}_1^*]) \mathcal{S}_x \mathcal{T}_{x\lambda}^{-\frac{1}{2}} = 0.$$

Note that

$$\|\mathcal{T}_{x\lambda}^{-\frac{1}{2}} \mathcal{S}_x^* \mathbf{a}_1\|_H = \frac{1}{n} \left\| \sum_{j=1}^n \mathbf{a}_1(j) \mathcal{T}_{x\lambda}^{-\frac{1}{2}} x_j \right\|_H \leq \frac{1}{n} \sum_{j=1}^n |\mathbf{a}_1(j)| \|\mathcal{T}_{x\lambda}^{-\frac{1}{2}} x_j\|_H.$$

Using Cauchy-Schwarz inequality and the bounded assumption (27),

$$\|\mathcal{T}_{x\lambda}^{-\frac{1}{2}} \mathcal{S}_x^* \mathbf{a}_1\|_H \leq \frac{1}{n} \|\mathbf{a}_1\|_2 \left( \sum_{j=1}^n \|\mathcal{T}_{x\lambda}^{-\frac{1}{2}} x_j\|_H^2 \right)^{\frac{1}{2}} \leq \left( \frac{1}{n} \sum_{j=1}^n \|\mathcal{T}_{x\lambda}^{-\frac{1}{2}} x_j\|_H^2 \right)^{\frac{1}{2}}.$$

According to  $\operatorname{tr}(x \otimes x) = \|x\|_H^2$  and the definition of  $\mathcal{T}_x$ , we know that the left-hand side is  $\sqrt{\operatorname{tr}(\mathcal{T}_{x\lambda}^{-1} \mathcal{T}_x)}$ , and thus

$$\|\mathcal{T}_{x\lambda}^{-\frac{1}{2}} \mathcal{S}_x^* \mathbf{a}_1\|_H \leq \sqrt{\operatorname{tr}(\mathcal{T}_{x\lambda}^{-1} \mathcal{T}_x)}.$$

Therefore,

$$\|\mathcal{T}_{x\lambda}^{-\frac{1}{2}} \mathcal{S}_x^* \mathbf{a}_1 \mathbf{a}_1^* \mathcal{S}_x \mathcal{T}_{x\lambda}^{-\frac{1}{2}}\| \leq \operatorname{tr}(\mathcal{T}_{x\lambda}^{-\frac{1}{2}} \mathcal{S}_x^* \mathbf{a}_1 \mathbf{a}_1^* \mathcal{S}_x \mathcal{T}_{x\lambda}^{-\frac{1}{2}}) \leq \|\mathcal{T}_{x\lambda}^{-\frac{1}{2}} \mathcal{S}_x^* \mathbf{a}_1\|_H^2 \leq \operatorname{tr}(\mathcal{T}_{x\lambda}^{-1} \mathcal{T}_x),$$

and by  $\|a - \mathbb{E}[a]\| \leq \|a\| + \mathbb{E}\|a\|$ ,

$$\|\mathcal{X}_1\| \leq 2 \operatorname{tr}(\mathcal{T}_{x\lambda}^{-1} \mathcal{T}_x).$$

Moreover, using  $\mathbb{E}[a - \mathbb{E}[a]]^2 \preceq \mathbb{E}a^2$ ,

$$\begin{aligned} \mathbb{E}[\mathcal{X}_1^2] &\preceq \mathbb{E}[\mathcal{T}_{x\lambda}^{-\frac{1}{2}} \mathcal{S}_x^* \mathbf{a}_1 \mathbf{a}_1^* \mathcal{S}_x \mathcal{T}_{x\lambda}^{-\frac{1}{2}}]^2 = \mathbb{E}[\|\mathcal{T}_{x\lambda}^{-\frac{1}{2}} \mathcal{S}_x^* \mathbf{a}_1\|_H^2 \mathcal{T}_{x\lambda}^{-\frac{1}{2}} \mathcal{S}_x^* \mathbf{a}_1 \mathbf{a}_1^* \mathcal{S}_x \mathcal{T}_{x\lambda}^{-\frac{1}{2}}] \\ &\preceq \operatorname{tr}(\mathcal{T}_{x\lambda}^{-1} \mathcal{T}_x) \mathcal{T}_{x\lambda}^{-\frac{1}{2}} \mathcal{S}_x^* \mathbb{E}[\mathbf{a}_1 \mathbf{a}_1^*] \mathcal{S}_x \mathcal{T}_{x\lambda}^{-\frac{1}{2}} \\ &= \operatorname{tr}(\mathcal{T}_{x\lambda}^{-1} \mathcal{T}_x) \mathcal{T}_{x\lambda}^{-1} \mathcal{T}_x. \end{aligned}$$

Letting  $\mathcal{V} = \text{tr}(\mathcal{T}_{\mathbf{x}\lambda}^{-1}\mathcal{T}_{\mathbf{x}})\mathcal{T}_{\mathbf{x}\lambda}^{-1}\mathcal{T}_{\mathbf{x}}$ , a simple calculation shows that

$$\|\mathcal{V}\| = \text{tr}(\mathcal{T}_{\mathbf{x}\lambda}^{-1}\mathcal{T}_{\mathbf{x}})\|\mathcal{T}_{\mathbf{x}\lambda}^{-1}\mathcal{T}_{\mathbf{x}}\| \leq \text{tr}(\mathcal{T}_{\mathbf{x}\lambda}^{-1}\mathcal{T}_{\mathbf{x}}).$$

Also,  $\|\mathcal{T}_{\mathbf{x}\lambda}^{-1}\mathcal{T}_{\mathbf{x}}\| = \frac{\|\mathcal{T}_{\mathbf{x}}\|}{\|\mathcal{T}_{\mathbf{x}}\| + \lambda}$ ,

$$\frac{\text{tr}(\mathcal{V})}{\|\mathcal{V}\|} = \frac{\text{tr}(\mathcal{T}_{\mathbf{x}\lambda}^{-1}\mathcal{T}_{\mathbf{x}})}{\|\mathcal{T}_{\mathbf{x}\lambda}^{-1}\mathcal{T}_{\mathbf{x}}\|} = \text{tr}(\mathcal{T}_{\mathbf{x}\lambda}^{-1}\mathcal{T}_{\mathbf{x}}) \left(1 + \frac{\lambda}{\|\mathcal{T}_{\mathbf{x}}\|}\right).$$

Applying Lemma 20, one can prove the desired result.  $\square$

### A.3. Proof of Lemma 13

If  $\lambda \geq \|\mathcal{T}_{\mathbf{x}}\|$ , then the result follows trivially,

$$\|(I - P)\mathcal{T}_{\mathbf{x}}^{\frac{1}{2}}\|^2 \leq \|(I - P)\|^2\|\mathcal{T}_{\mathbf{x}}\| \leq \frac{1}{n^\theta}.$$

We thus only need to consider the case  $\lambda \leq \|\mathcal{T}_{\mathbf{x}}\|$ . Let  $M = m^{-1}\mathbf{S}_{\mathbf{x}}^*\mathbf{G}^*\mathbf{G}\mathbf{S}_{\mathbf{x}}$  and  $M_\lambda = M + \lambda I$ . Applying Lemma 12, we know that there exists a subset  $U_{\mathbf{x}}$  of  $\mathbb{R}^{m \times n}$  with measure at least  $1 - \delta$ , such that

$$\left\|\mathcal{T}_{\mathbf{x}\lambda}^{-1/2}(\mathcal{T}_{\mathbf{x}} - M)\mathcal{T}_{\mathbf{x}\lambda}^{-1/2}\right\| \leq \frac{4\mathcal{N}_{\mathbf{x}}(\lambda)\beta}{3m} + \sqrt{\frac{2\mathcal{N}_{\mathbf{x}}(\lambda)\beta}{m}}, \quad \forall \mathbf{G} \in U_{\mathbf{x}}. \quad (56)$$

Using Condition (39),

$$\mathcal{N}_{\mathbf{x}}(\lambda) \leq b_\gamma n^{\theta\gamma}.$$

With  $\lambda \leq \|\mathcal{T}_{\mathbf{x}}\|$ , we have

$$\beta \leq \log \frac{4b_\gamma n^{\theta\gamma}(1 + \lambda/\|\mathcal{T}_{\mathbf{x}}\|)}{\delta} \leq \log \frac{8b_\gamma n^{\theta\gamma}}{\delta},$$

and, combining with (40),

$$\frac{4\mathcal{N}_{\mathbf{x}}(\lambda)\beta}{3m} + \sqrt{\frac{2\mathcal{N}_{\mathbf{x}}(\lambda)\beta}{m}} \leq \frac{2}{3}.$$

Thus,

$$\left\|\mathcal{T}_{\mathbf{x}\lambda}^{-1/2}(\mathcal{T}_{\mathbf{x}} - M)\mathcal{T}_{\mathbf{x}\lambda}^{-1/2}\right\| \leq \frac{2}{3}, \quad \forall \mathbf{G} \in U_{\mathbf{x}}.$$

Following from (Caponnetto & De Vito, 2007),

$$\|M_\lambda^{-1/2}\mathcal{T}_{\mathbf{x}\lambda}^{\frac{1}{2}}\|^2 = \|\mathcal{T}_{\mathbf{x}\lambda}^{\frac{1}{2}}M_\lambda^{-1}\mathcal{T}_{\mathbf{x}\lambda}^{\frac{1}{2}}\|^2 = \|(I - \mathcal{T}_{\mathbf{x}\lambda}^{-1/2}(\mathcal{T}_{\mathbf{x}} - M)\mathcal{T}_{\mathbf{x}\lambda}^{-1/2})^{-1/2}\|,$$

we get

$$\|M_\lambda^{-1/2}\mathcal{T}_{\mathbf{x}\lambda}^{\frac{1}{2}}\|^2 \leq 3, \quad \forall \mathbf{G} \in U_{\mathbf{x}}. \quad (57)$$

Let  $W = m^{-1/2}\mathbf{G}\mathbf{S}_{\mathbf{x}}$ . As  $P$  is the projection operator onto  $\overline{\text{range}\{W^*\}}$ ,

$$P = W^*(WW^*)^\dagger W \succeq W^*(WW^* + \lambda)^{-1}W = W^*W(W^*W + \lambda)^{-1} = M(M + \lambda)^{-1},$$

where for the last second equality, we used Lemma 17. Thus (Rudi et al., 2015),

$$I - P \preceq I - M(M + \lambda)^{-1} = \lambda(M + \lambda)^{-1}.$$

It thus follows that

$$\mathcal{T}_{\mathbf{x}}^{\frac{1}{2}}(I - P)\mathcal{T}_{\mathbf{x}}^{\frac{1}{2}} \preceq \lambda\mathcal{T}_{\mathbf{x}}^{\frac{1}{2}}(M + \lambda)^{-1}\mathcal{T}_{\mathbf{x}}^{\frac{1}{2}} \preceq \lambda\mathcal{T}_{\mathbf{x}\lambda}^{\frac{1}{2}}(M + \lambda)^{-1}\mathcal{T}_{\mathbf{x}\lambda}^{\frac{1}{2}}.$$

Using  $\|A^*A\|^2 = \|A\|^2$  and the above,

$$\|(I - P)\mathcal{T}_{\mathbf{x}}^{\frac{1}{2}}\|^2 = \|\mathcal{T}_{\mathbf{x}}^{\frac{1}{2}}(I - P)\mathcal{T}_{\mathbf{x}}^{\frac{1}{2}}\|^2 \leq \lambda\|\mathcal{T}_{\mathbf{x}\lambda}^{\frac{1}{2}}(M + \lambda)^{-1}\mathcal{T}_{\mathbf{x}\lambda}^{\frac{1}{2}}\|^2 = \lambda\|(M + \lambda)^{-1/2}\mathcal{T}_{\mathbf{x}\lambda}^{\frac{1}{2}}\|^2. \quad (58)$$

Applying (57), one can prove the desired result.

#### A.4. Proof of Lemma 14

Since  $P$  is a projection operator,  $(I - P)^2 = I - P$ . Then

$$\|A^s(I - P)A^t\| = \|A^s(I - P)(I - P)A^t\| \leq \|A^s(I - P)\| \|(I - P)A^t\|.$$

Moreover, by Lemma 16,

$$\|A^s(I - P)\| = \|A^{\frac{1}{2}2s}(I - P)^{2s}\| \leq \|A^{\frac{1}{2}}(I - P)\|^{2s}.$$

Similarly,  $\|(I - P)A^t\| \leq \|(I - P)A^{\frac{1}{2}}\|^{2t}$ . Thus,

$$\|A^s(I - P)A^t\| \leq \|A^{\frac{1}{2}}(I - P)\|^{2s} \|(I - P)A^{\frac{1}{2}}\|^{2t} = \|(I - P)A^{\frac{1}{2}}\|^{2(t+s)}.$$

Using  $\|D\|^2 = \|D^*D\|$ ,

$$\|A^s(I - P)A^t\| \leq \|(I - P)A(I - P)\|^{t+s}.$$

Adding and subtracting with the same term, using the triangle inequality, and noting that  $\|I - P\| \leq 1$  and  $s + t \leq 1$ ,

$$\begin{aligned} \|A^s(I - P)A^t\| &\leq \|(I - P)A(I - P)\|^{t+s} \\ &\leq (\|(I - P)(A - B)(I - P)\| + \|(I - P)B(I - P)\|)^{t+s} \\ &\leq \|A - B\|^{s+t} + \|(I - P)B(I - P)\|^{s+t}, \end{aligned}$$

which leads to the desired result using  $\|D^*D\| = \|DD^*\|$ .

#### A.5. Proof of Lemma 15

To prove the result, we need the following concentration inequality.

**Lemma 21.** *Let  $w_1, \dots, w_m$  be i.i.d random variables in a separable Hilbert space with norm  $\|\cdot\|$ . Suppose that there are two positive constants  $B$  and  $\sigma^2$  such that*

$$\mathbb{E}[\|w_1 - \mathbb{E}[w_1]\|^l] \leq \frac{1}{2} l! B^{l-2} \sigma^2, \quad \forall l \geq 2. \quad (59)$$

Then for any  $0 < \delta < 1/2$ , the following holds with probability at least  $1 - \delta$ ,

$$\left\| \frac{1}{m} \sum_{k=1}^m w_k - \mathbb{E}[w_1] \right\| \leq 2 \left( \frac{B}{m} + \frac{\sigma}{\sqrt{m}} \right) \log \frac{2}{\delta}.$$

In particular, (59) holds if

$$\|w_1\| \leq B/2 \text{ a.s., and } \mathbb{E}[\|w_1\|^2] \leq \sigma^2. \quad (60)$$

The above lemma is a reformulation of the concentration inequality for sums of Hilbert-space-valued random variables from (Pinelis & Sakhanenko, 1986). We refer to (Smale & Zhou, 2007; Caponnetto & De Vito, 2007) for the detailed proof.

*Proof of Lemma 15.* We first use Lemma 21 to estimate  $\text{tr}(\mathcal{T}_\lambda^{-\frac{1}{2}}(\mathcal{T}_x - \mathcal{T})\mathcal{T}_\lambda^{-\frac{1}{2}})$ . Note that

$$\text{tr}(\mathcal{T}_\lambda^{-\frac{1}{2}}\mathcal{T}_x\mathcal{T}_\lambda^{-\frac{1}{2}}) = \frac{1}{n} \sum_{j=1}^n \|\mathcal{T}_\lambda^{-\frac{1}{2}}x_j\|_H^2 = \frac{1}{n} \sum_{j=1}^n \xi_j,$$

where we let  $\xi_j = \|\mathcal{T}_\lambda^{-\frac{1}{2}}x_j\|_H^2$  for all  $j \in [n]$ . Besides, it is easy to see that

$$\text{tr}(\mathcal{T}_\lambda^{-\frac{1}{2}}(\mathcal{T}_x - \mathcal{T})\mathcal{T}_\lambda^{-\frac{1}{2}}) = \frac{1}{n} \sum_{j=1}^n (\xi_j - \mathbb{E}[\xi_j]).$$



Using Assumption (2),

$$\xi_1 \leq \frac{1}{\lambda} \|x_1\|_H^2 \leq \frac{\kappa^2}{\lambda},$$

and

$$\mathbb{E}[\|\xi_1\|^2] \leq \frac{\kappa^2}{\lambda} \mathbb{E}\|\mathcal{T}_\lambda^{-\frac{1}{2}} x_1\|_H^2 \leq \frac{\kappa^2 \mathcal{N}(\lambda)}{\lambda}.$$

Applying Lemma 21, we get that there exists a subset  $V_1$  of  $Z^n$  with measure at least  $1 - \delta$ , such that for all  $\mathbf{z} \in V_1$ ,

$$\text{tr}(\mathcal{T}_\lambda^{-\frac{1}{2}} (\mathcal{T}_\mathbf{x} - \mathcal{T}) \mathcal{T}_\lambda^{-\frac{1}{2}}) \leq 2 \left( \frac{2\kappa^2}{n\lambda} + \sqrt{\frac{\kappa^2 \mathcal{N}(\lambda)}{n\lambda}} \right) \log \frac{2}{\delta}.$$

Combining with Lemma 8, taking the union bounds, rescaling  $\delta$ , and noting that

$$\begin{aligned} \text{tr}(\mathcal{T}_{\mathbf{x}\lambda}^{-1} \mathcal{T}_\mathbf{x}) &= \text{tr}(\mathcal{T}_{\mathbf{x}\lambda}^{-\frac{1}{2}} \mathcal{T}_\lambda^{\frac{1}{2}} \mathcal{T}_\lambda^{-\frac{1}{2}} \mathcal{T}_\mathbf{x} \mathcal{T}_\lambda^{-\frac{1}{2}} \mathcal{T}_\lambda^{\frac{1}{2}} \mathcal{T}_{\mathbf{x}\lambda}^{-\frac{1}{2}}) \\ &\leq \|\mathcal{T}_\lambda^{\frac{1}{2}} \mathcal{T}_{\mathbf{x}\lambda}^{-\frac{1}{2}}\|^2 \text{tr}(\mathcal{T}_\lambda^{-\frac{1}{2}} \mathcal{T}_\mathbf{x} \mathcal{T}_\lambda^{-\frac{1}{2}}) \\ &= \|\mathcal{T}_\lambda^{\frac{1}{2}} \mathcal{T}_{\mathbf{x}\lambda}^{-\frac{1}{2}}\|^2 \left( \text{tr}(\mathcal{T}_\lambda^{-\frac{1}{2}} (\mathcal{T}_\mathbf{x} - \mathcal{T}) \mathcal{T}_\lambda^{-\frac{1}{2}}) + \mathcal{N}(\lambda) \right). \end{aligned}$$

we get that there exists a subset  $V$  of  $Z^n$  with measure at least  $1 - \delta$ , such that for all  $\mathbf{z} \in V$ ,

$$\text{tr}((\mathcal{T}_\mathbf{x} + \lambda)^{-1} \mathcal{T}_\mathbf{x}) \leq 3a_{n,\delta/2,\gamma}(\theta) \left( 2 \left( \frac{2\kappa^2}{n\lambda} + \sqrt{\frac{\kappa^2 \mathcal{N}(\lambda)}{n\lambda}} \right) \log \frac{4}{\delta} + \mathcal{N}(\lambda) \right),$$

which leads to the desired result using  $\lambda \leq 1$ ,  $n\lambda \geq 1$  and Assumption 3.  $\square$

## A.6. Proof for Corollary 5

*Proof.* Using a similar argument as that for (58), with  $W = \mathcal{S}_{\tilde{\mathbf{x}}}$ , where  $\tilde{\mathbf{x}} = \{x_1, \dots, x_m\}$ , we get for any  $\eta > 0$ ,

$$\|(I - P)\mathcal{T}^{\frac{1}{2}}\|^2 \leq \eta \|(\mathcal{T}_{\tilde{\mathbf{x}}} + \eta)^{-1/2} (\mathcal{T} + \eta)^{1/2}\|^2.$$

Letting  $\eta = \frac{1}{m}$ , and using Lemma 8, we get that with probability at least  $1 - \delta$ ,

$$\|(I - P)\mathcal{T}^{\frac{1}{2}}\|^2 \lesssim \frac{1}{m} \log \frac{3m^\gamma}{\delta}.$$

Combining with Corollary 3, one can prove the desired result.  $\square$

## B. Learning with Kernel Methods

Let the input space  $\Xi$  be a closed subset of Euclidean space  $\mathbb{R}^d$ , the output space  $Y \subseteq \mathbb{R}$ . Let  $\mu$  be an unknown but fixed Borel probability measure on  $\Xi \times Y$ . Assume that  $\{(\xi_i, y_i)\}_{i=1}^m$  are i.i.d. from the distribution  $\mu$ . A reproducing kernel  $K$  is a symmetric function  $K : \Xi \times \Xi \rightarrow \mathbb{R}$  such that  $(K(u_i, u_j))_{i,j=1}^\ell$  is positive semidefinite for any finite set of points  $\{u_i\}_{i=1}^\ell$  in  $\Xi$ . The kernel  $K$  defines a reproducing kernel Hilbert space (RKHS)  $(\mathcal{H}_K, \|\cdot\|_K)$  as the completion of the linear span of the set  $\{K_\xi(\cdot) := K(\xi, \cdot) : \xi \in \Xi\}$  with respect to the inner product  $\langle K_\xi, K_u \rangle_K := K(\xi, u)$ . For any  $f \in \mathcal{H}_K$ , the reproducing property holds:  $f(\xi) = \langle K_\xi, f \rangle_K$ .

**Example B.1** (Sobolev Spaces). *Let  $X = [0, 1]$  and the kernel*

$$K(x, x') = \begin{cases} (1-y)x, & x \leq y; \\ (1-x)y, & x \geq y. \end{cases}$$

*Then the kernel induces a Sobolev Space  $H = \{f : X \rightarrow \mathbb{R} \mid f \text{ is absolutely continuous, } f(0) = f(1) = 0, f \in L^2(X)\}$ .*

In learning with kernel methods, one considers the following minimization problem

$$\inf_{f \in \mathcal{H}_K} \int_{\Xi \times Y} (f(\xi) - y)^2 d\mu(\xi, y).$$

Since  $f(\xi) = \langle K_\xi, f \rangle_K$  by the reproducing property, the above can be rewritten as

$$\inf_{f \in \mathcal{H}_K} \int_{\Xi \times Y} (\langle f, K_\xi \rangle_K - y)^2 d\mu(\xi, y).$$

Letting  $X = \{K_\xi : \xi \in \Xi\}$  and defining another probability measure  $\rho(K_\xi, y) = \mu(\xi, y)$ , the above reduces to the learning setting in Section 2.
